# Supplementary material for: Potential for colloid removal from petrochemical secondary effluent by coagulation–flocculation coupled with persulfate process
Source: Royal Society of Chemistry journal article supplement (doi:10.1039/d1ew00659b), 2021-11-02
Supplement: d1ew00659b1.pdf [file d1ew00659b1.pdf]

## In Supplementary Information

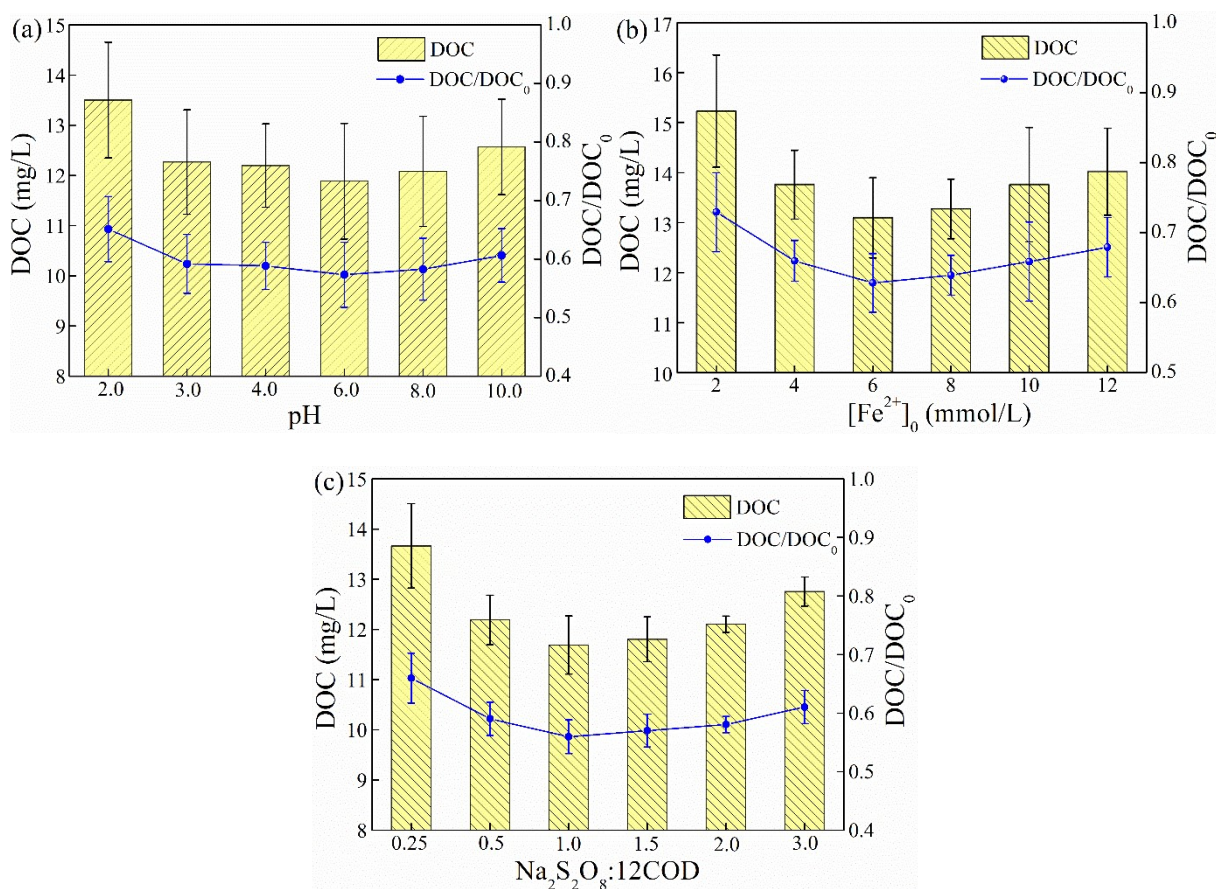

**Fig. S1** Factors of DOC removal in PS process. (a) different initial pH value. Conditions: [Fe<sup>2+</sup>]<sub>0</sub> = 6.0 mmol/L, [Na<sub>2</sub>S<sub>2</sub>O<sub>8</sub>]<sub>0</sub> = 6.0 mmol/L; (b) different [Fe<sup>2+</sup>]<sub>0</sub> at [Na<sub>2</sub>S<sub>2</sub>O<sub>8</sub>]<sub>0</sub> = 6.0 mmol/L; (c) different ratio of initial Na<sub>2</sub>S<sub>2</sub>O<sub>8</sub>:12COD at [Fe<sup>2+</sup>]<sub>0</sub> = 6.0 mmol/L.

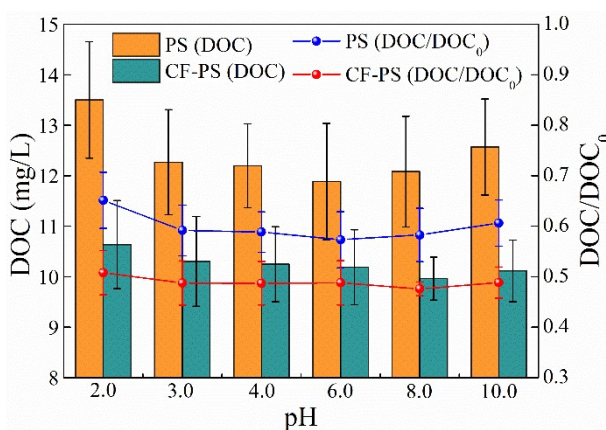

**Fig. S2** The effect of initial pH on DOC removal in the PS and CF-PS processes. Conditions: [PAC]<sub>0</sub> = 20.0 mg/L; [Fe<sup>2+</sup>]<sub>0</sub> = 6.0 mmol/L; [Na<sub>2</sub>S<sub>2</sub>O<sub>8</sub>]<sub>0</sub> = 6.0 mmol/L

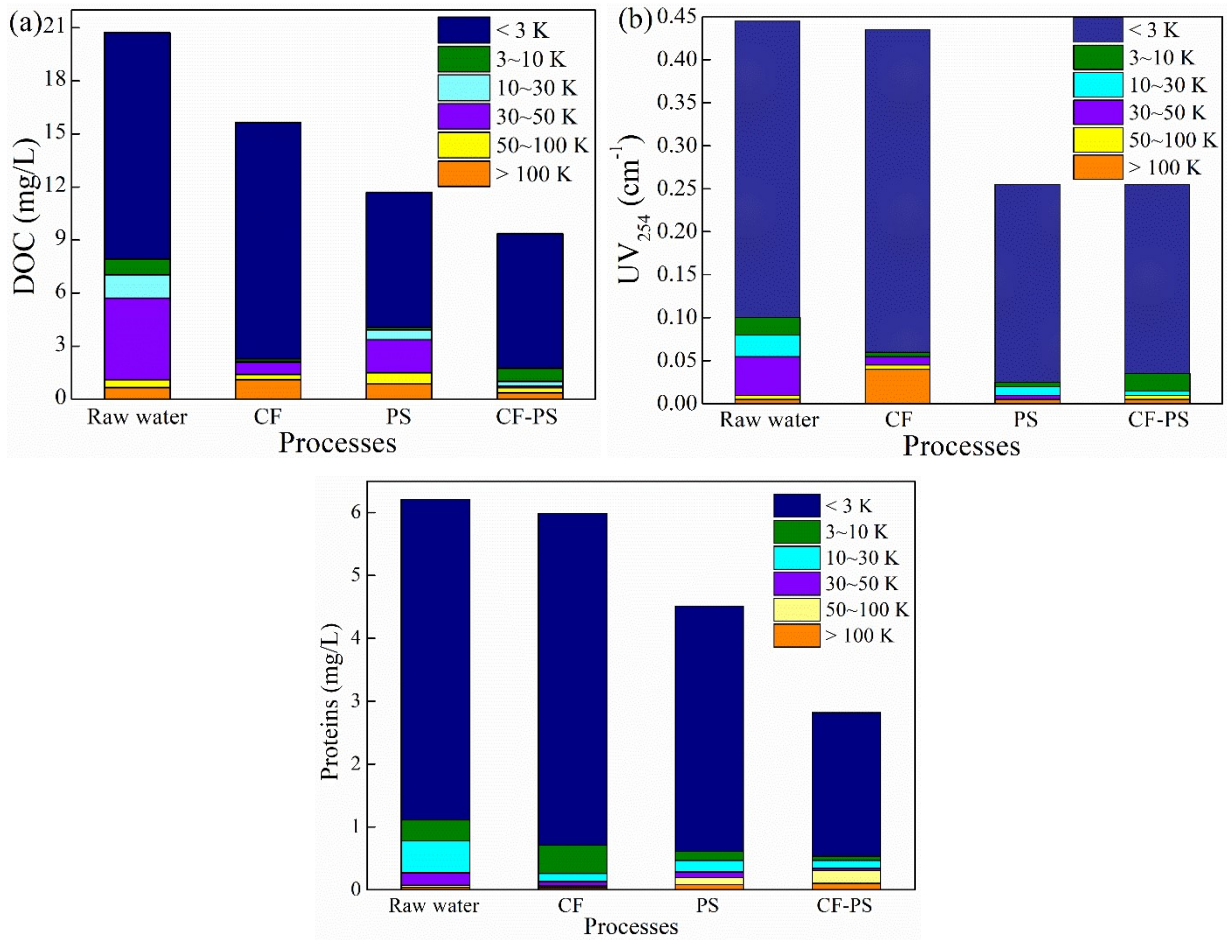

Fig. S3. MW distribution of organic matter under different processes. (a) DOC; (b) UV<sub>254</sub>; (c) Proteins.

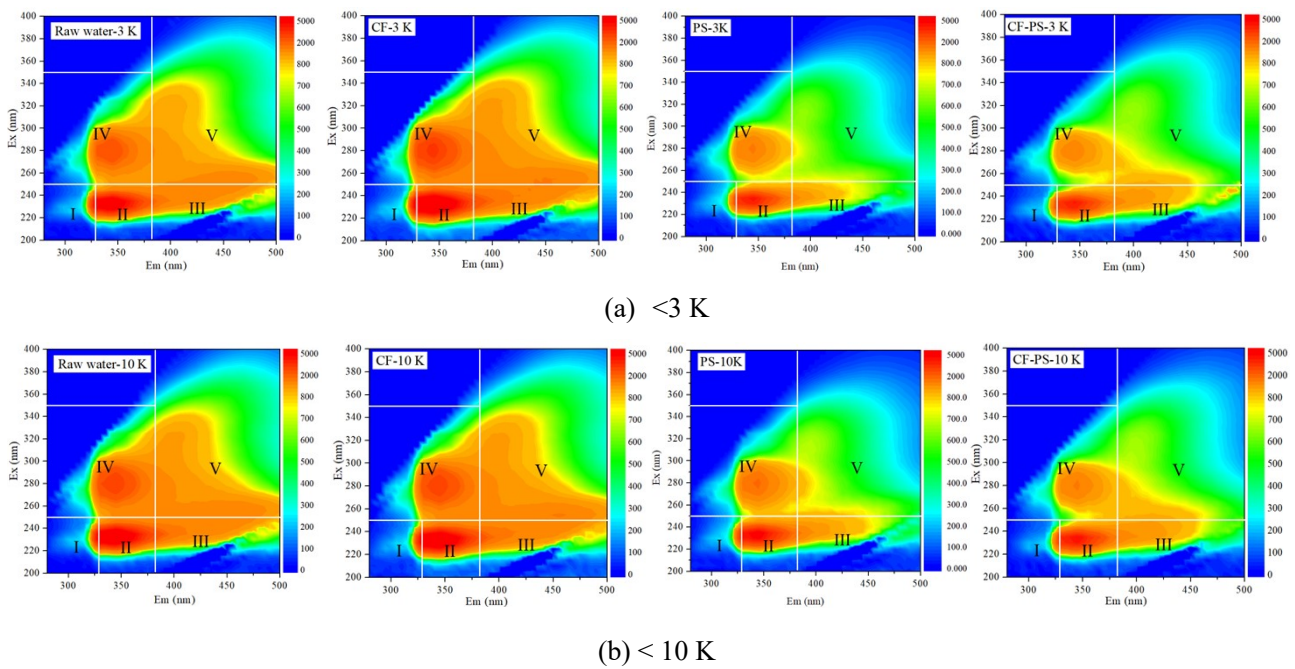

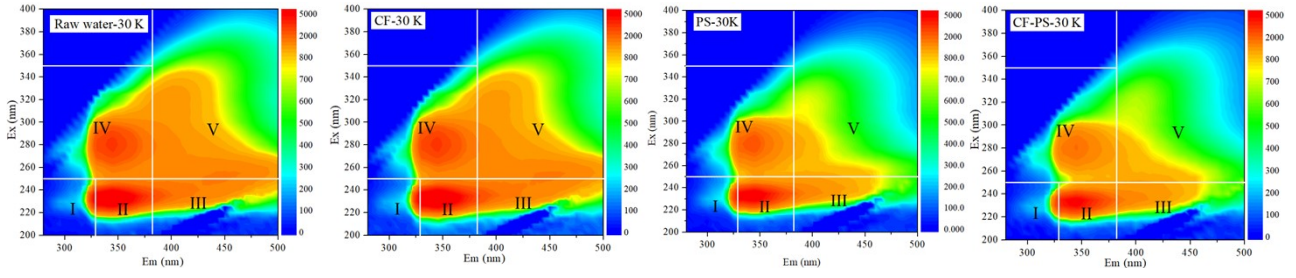

(c) < 30 K

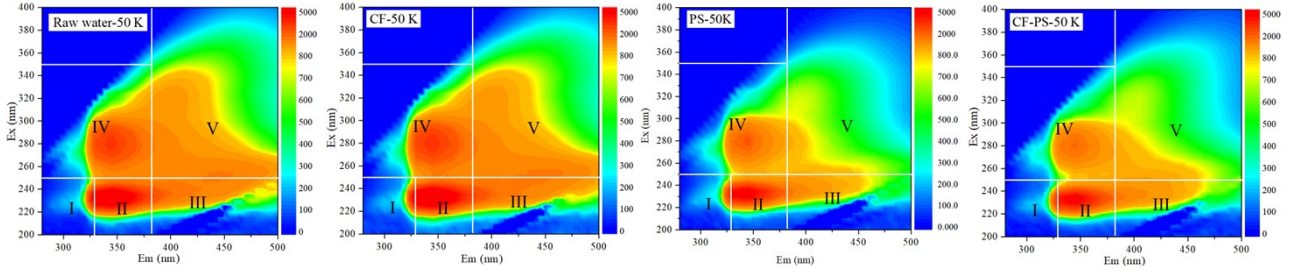

(d) < 50 K

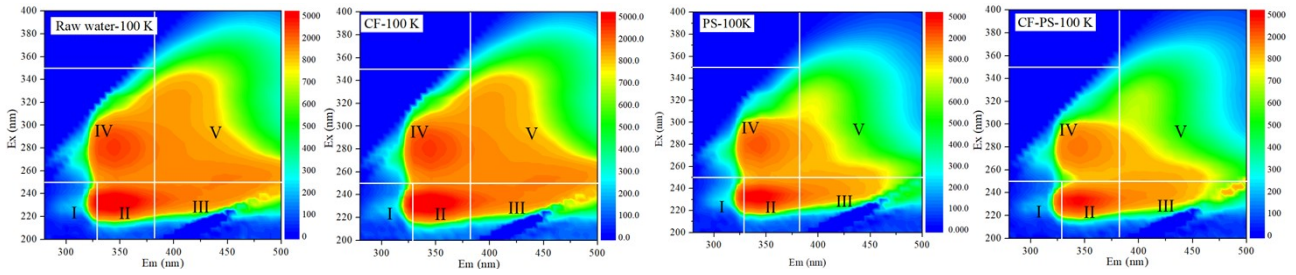

(e) < 100 K

**Fig. S4** 3D-EEM spectra of organic components with different MWs
