# Supplementary material for: Potential for colloid removal from petrochemical secondary effluent by coagulation–flocculation coupled with persulfate process
Source: Royal Society of Chemistry journal article supplement (doi:10.1039/d1ew00659b), 2021-11-02
Supplement: d1ew00659b2.pdf [file d1ew00659b2.pdf]

## Supplementary Information

### **Potential of the colloidal removal from petrochemical secondary effluent by coagulation-flocculation coupled with persulfate process**

Min Li <sup>a,b</sup>, Liya Fu<sup>a,b\*</sup>, Meng Zhao <sup>a,b</sup>, Lujie Liu <sup>c</sup>, Yuexi Zhou<sup>a,b</sup>, Yin Yu <sup>a,b</sup>, Changyong Wu<sup>a,b\*</sup>

<sup>a</sup> State Key Laboratory of Environmental Criteria and Risk Assessment, Chinese Research Academy of Environment Sciences, Beijing 100012, China

<sup>b</sup> Research Center of Water Pollution Control Technology, Chinese Research Academy of Environment Sciences, Beijing 100012, China

<sup>c</sup> China Three Gorges Construction Engineering Corporation, Beijing 101100, China

To whom correspondence should be addressed

E-mail address: liyafu1115@163.com (L. Fu); Changyongwu@126.com (C. Wu);

### Factors of PS oxidation treatment

The main reasons for the decrease of  $c(\text{Fe}^{2+})$  excess system efficiency are as follows: (1) Excess  $\text{Fe}^{2+}$  can catalyze the generation of more  $\text{SO}_4^{\cdot-}$  (Eq.1), and the sulfate radicals will self-scavenge (terminate the chain reaction, Eq.2);<sup>1</sup> (2) The rapid formation of  $\cdot\text{OH}$  and  $\text{SO}_4^{\cdot-}$  tends to react with  $\text{Fe}^{2+}$  (Eq.3 and Eq.4), which reduces the effective utilization of  $\text{SO}_4^{\cdot-}$  and  $\cdot\text{OH}$ ;<sup>2</sup> (3) It has been reported that excess  $\text{Fe}^{2+}$  was oxidized to  $\text{Fe}^{3+}$  and then transformed to various Ferric oxyhydroxides through hydrolysis (Eq.5-7).<sup>3</sup> Rao et al. found that  $\text{Fe}^{3+}$ ,  $\text{FeOH}^{2+}$ ,  $\text{Fe}(\text{OH})_2^+$ , and  $\text{Fe}_2(\text{OH})_2^{4+}$  activated PS with low efficiency.<sup>4</sup>

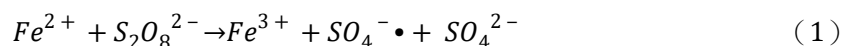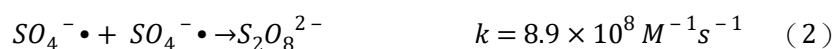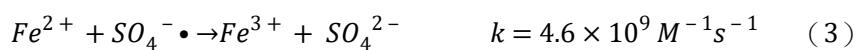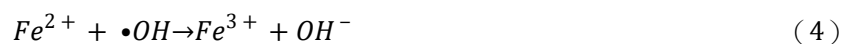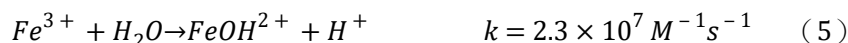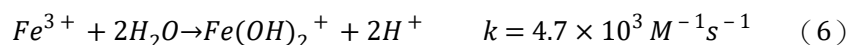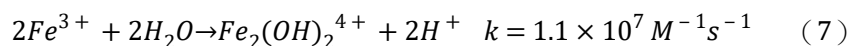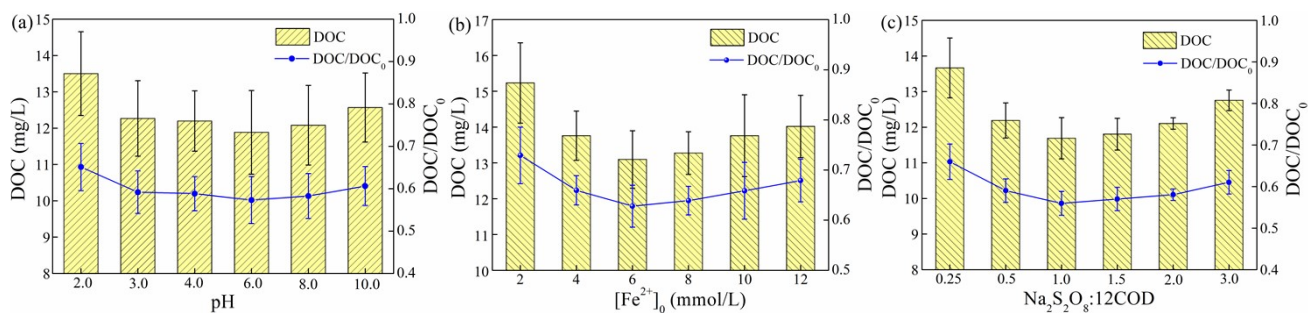

**Fig. S1 Factors of DOC removal in PS process. (a) different initial pH value. Conditions:  $[\text{Fe}^{2+}]_0 = 6.0$  mmol/L,  $[\text{Na}_2\text{S}_2\text{O}_8]_0 = 6.0$  mmol/L; (b) different  $[\text{Fe}^{2+}]_0$  at  $[\text{Na}_2\text{S}_2\text{O}_8]_0 = 6.0$  mmol/L; (c) different ratio of initial  $\text{Na}_2\text{S}_2\text{O}_8:12\text{COD}$  at  $[\text{Fe}^{2+}]_0 = 6.0$  mmol/L.**

Excess  $\text{Na}_2\text{S}_2\text{O}_8$  reduces the degradation efficiency for the following three reasons: (1) Excess  $\text{S}_2\text{O}_8^{2-}$  leads to elimination of  $\text{SO}_4^{\cdot-}$  (Eq.1 and Eq.2);<sup>5</sup> (2) Excess  $\text{S}_2\text{O}_8^{2-}$  will produce more  $\text{SO}_4^{\cdot-}$ , and its hydrolysis will be further converted to  $\cdot\text{OH}$  (Eq.2 and Eq.8);<sup>6</sup> (3) Excess  $\text{S}_2\text{O}_8^{2-}$  inhibits  $\text{SO}_4^{\cdot-}$  and  $\cdot\text{OH}$  (Eq.9 and Eq.10).<sup>7</sup> Compared with  $\text{SO}_4^{\cdot-}$  and  $\cdot\text{OH}$ , the  $\text{S}_2\text{O}_8^{\cdot-}$  has a lower REDOX potential.<sup>8</sup> Therefore, the optimal  $c(\text{Na}_2\text{S}_2\text{O}_8):12\text{COD}$  ratio was 1.0, that is, the dosage of PS was 1020 mg/L.

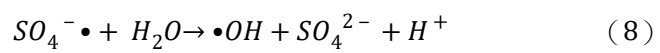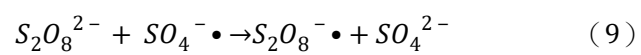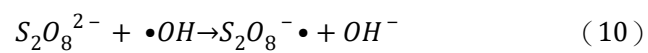

*Effect of coagulation pretreatment on initial pH*

As shown in Fig. S2, the optimal pH value of coagulation pretreatment was 8.0, and the removal reached 52.0%, which was 9.0% higher than that of single PS oxidation process (when the optimal pH value was 6.0). With the change of pH, the DOC removal did not change much, indicating that the pH has almost no effect on the DOC removal of the wastewater in the CF-PS process.

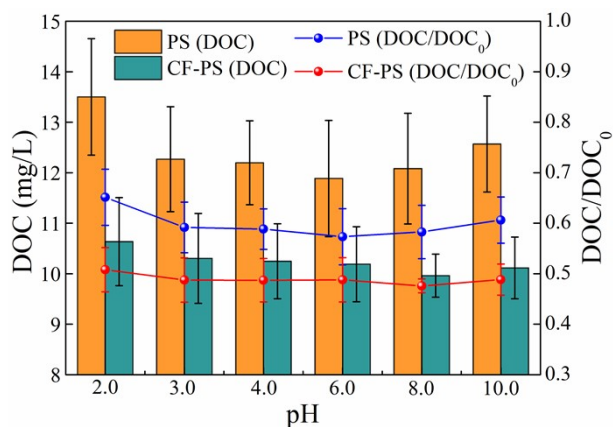

**Fig. S2** The effect of initial pH on DOC removal in the PS and CF-PS processes. Conditions:  $[\text{PAC}]_0 = 20.0$  mg/L;  $[\text{Fe}^{2+}]_0 = 6.0$  mmol/L;  $[\text{Na}_2\text{S}_2\text{O}_8]_0 = 6.0$  mmol/L

*Variation of colloidal content with different MWs*

The formula of  $X$  removal is:

$$X\% = (A_t - A_0)/A_t * 100\% \quad (11)$$

where the  $A_0$  (mg/L) and  $A_t$  (mg/L) represents the value of DOC/UV<sub>254</sub> at the initial and time  $t$  (min), respectively.

Table.S1 DOC degradation contribution of each MW fraction with CF, PS, and CF-PS processes

| MWs        |          | DOC degradation (%) |       |       |
|------------|----------|---------------------|-------|-------|
|            |          | CF                  | PS    | CF-PS |
| High-MWs   | >100 K   | -64.2               | -31.3 | 46.3  |
|            | 50~100 K | 28.6                | -47.6 | 33.3  |
| medium-MWs | 30~50 K  | 85.1                | 59.8  | 97.6  |
|            | 10~30 K  | 96.2                | 57.3  | 79.4  |
|            | 3~10 K   | 84.3                | 85.4  | 19.1  |
| low-MWs    | <3 K     | -4.3                | 40.3  | 40.6  |

Table.S2 UV<sub>254</sub> degradation contribution of each MW fraction with CF, PS, and CF-PS processes

| MWs        |          | UV <sub>254</sub> degradation (%) |       |        |
|------------|----------|-----------------------------------|-------|--------|
|            |          | CF                                | PS    | CF-PS  |
| High-MWs   | > 100 K  | -700.0                            | 0.0   | 0.0    |
|            | 50~100 K | 0.0                               | 100.0 | 0.0    |
| Medium-MWs | 30~50 K  | 77.0                              | 88.9  | 100.0  |
|            | 10~30 K  | 100.0                             | 60.0  | -100.0 |
|            | 3~10 K   | 75.0                              | 75.0  | 0.0    |
| Low-MWs    | < 3 K    | -8.7                              | 33.0  | 36.2   |

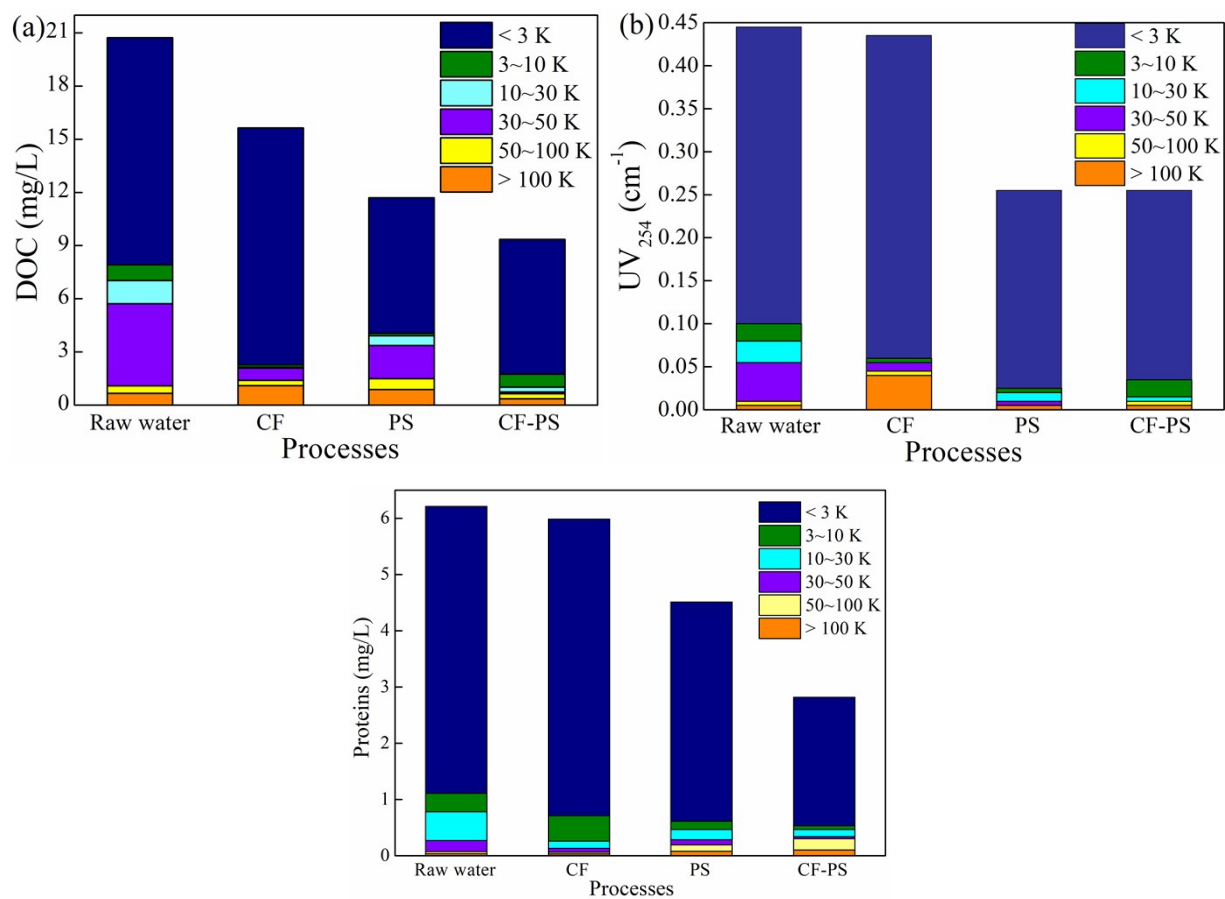

Fig. S3. MW distribution of organic matter under different processes. (a) DOC; (b) UV<sub>254</sub>; (c) Proteins.

*Fluorescent organics with different MWs*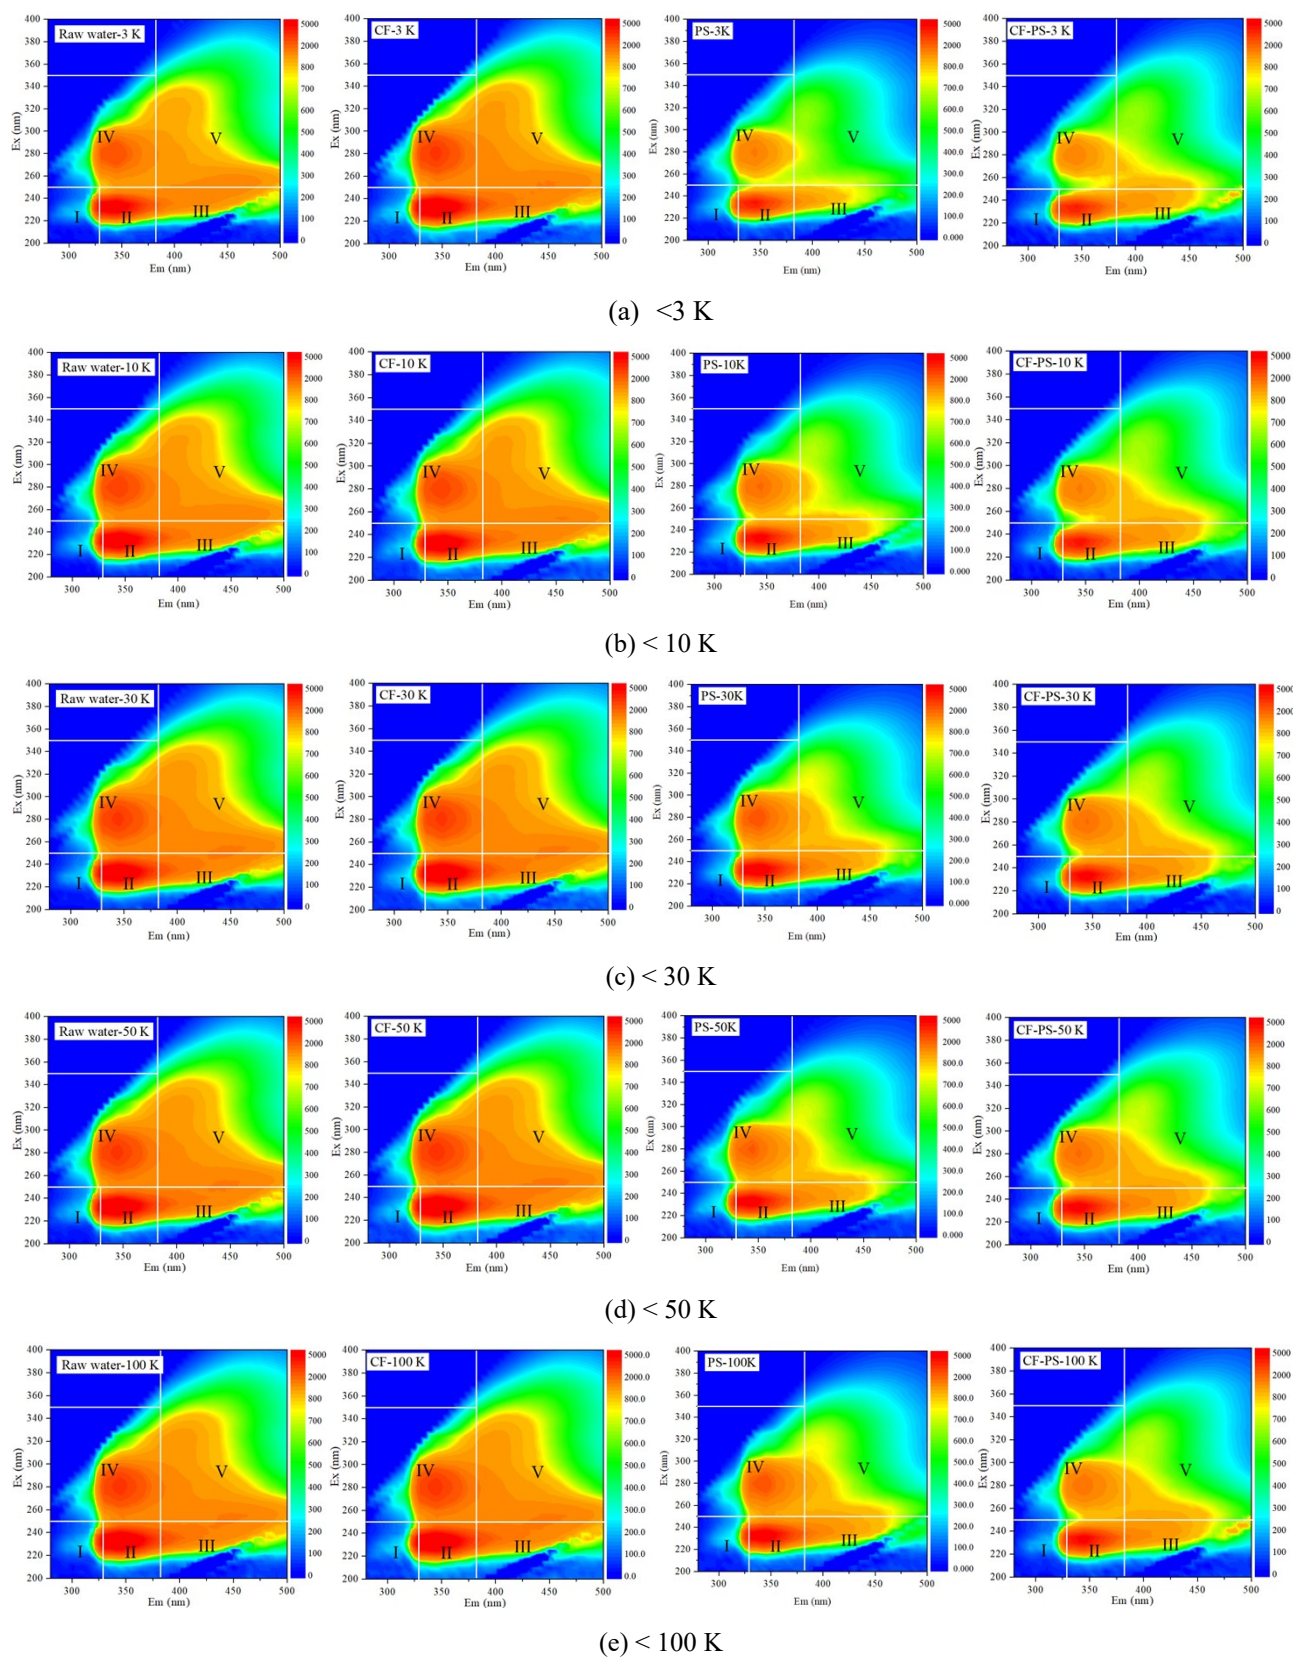**Fig. S4 3D-EEM spectra of organic components with different MWs**

**Table.S3 Regional fluorescence integral standard volume with different MWs**

| Processes           | MWs      | Regional fluorescence integral standard volume, |        |        |        |        |        |
|---------------------|----------|-------------------------------------------------|--------|--------|--------|--------|--------|
|                     |          | $\Phi_{i,n}/\times 10^4$                        |        |        |        |        |        |
|                     |          | I                                               | II     | III    | IV     | V      | Total  |
| Raw water           | >100 K   | 5.40                                            | 36.22  | 5.28   | 13.50  | 2.51   | 62.92  |
|                     | 50~100 K | 3.45                                            | 20.32  | 6.90   | 7.62   | 1.09   | 39.38  |
|                     | 30~50 K  | 8.50                                            | 26.23  | 6.01   | 11.97  | 1.26   | 53.96  |
|                     | 10~30 K  | 2.37                                            | 26.04  | 5.67   | 12.48  | 2.73   | 49.28  |
|                     | 3~10 K   | 5.22                                            | 44.82  | 7.30   | 23.62  | 7.73   | 88.69  |
|                     | <3 K     | 53.41                                           | 258.02 | 88.23  | 129.63 | 87.01  | 616.31 |
|                     | Total    | 78.36                                           | 411.65 | 119.38 | 198.81 | 102.34 | 910.53 |
| CF                  | >100K    | 2.38                                            | 56.26  | 9.59   | 25.89  | 6.28   | 100.4  |
|                     | 50~100 K | 0.56                                            | 11.04  | 2.04   | 12.47  | 1.70   | 27.82  |
|                     | 30~50 K  | 3.16                                            | 8.45   | 1.81   | 5.01   | 0.58   | 19.00  |
|                     | 10~30 K  | 0.76                                            | 11.80  | 2.56   | -10.85 | 3.13   | 7.41   |
|                     | 3~10 K   | 3.51                                            | 29.09  | 4.79   | 14.94  | -0.93  | 51.40  |
|                     | <3 K     | 62.28                                           | 305.72 | 99.93  | 151.71 | 94.92  | 714.56 |
|                     | Total    | 72.66                                           | 422.37 | 120.73 | 199.17 | 105.68 | 920.60 |
| PS<br>oxidation     | >100 K   | 4.28                                            | 47.41  | 11.9   | 17.13  | 6.49   | 87.21  |
|                     | 50~100 K | 3.90                                            | 20.81  | 4.40   | 7.68   | 5.25   | 42.04  |
|                     | 30~50 K  | 3.44                                            | 18.87  | 4.45   | 7.82   | 0.81   | 35.38  |
|                     | 10~30 K  | 1.17                                            | 12.32  | 0.90   | 2.57   | 1.03   | 17.99  |
|                     | 3~10 K   | 8.16                                            | 38.53  | 7.48   | 12.51  | 5.26   | 71.93  |
|                     | <3 K     | 37.15                                           | 163.45 | 52.02  | 86.02  | 46.47  | 385.11 |
|                     | Total    | 58.10                                           | 301.39 | 81.14  | 133.72 | 65.30  | 639.66 |
| CF -PS<br>oxidation | >100 K   | 2.30                                            | 38.75  | 1.56   | 9.72   | 3.79   | 56.14  |
|                     | 50~100 K | 2.99                                            | 15.61  | 4.09   | 3.93   | 0.82   | 27.43  |
|                     | 30~50 K  | 2.99                                            | 15.61  | 4.09   | 3.93   | 0.82   | 27.43  |
|                     | 10~30 K  | 1.04                                            | 15.98  | 1.87   | 5.34   | 1.87   | 26.10  |
|                     | 3~10 K   | 1.86                                            | 13.21  | 0.59   | 6.94   | 1.65   | 24.25  |
|                     | <3 K     | 33.78                                           | 159.71 | 61.94  | 81.21  | 54.12  | 390.75 |
|                     | Total    | 43.52                                           | 249.69 | 70.88  | 115.75 | 61.78  | 541.62 |

**Table. S4 Degradation of  $\Phi_{i,n}$  (%) with different MWs**

| Processes | MWs | Removal of $\Phi_{i,n}/\%$ |
|-----------|-----|----------------------------|
|-----------|-----|----------------------------|



## Supplementary Information

|                     |          | I      | II     | III     | IV     | V       | Total  |
|---------------------|----------|--------|--------|---------|--------|---------|--------|
| CF                  | >100 K   | 55.87  | -55.32 | -81.66  | -91.83 | -150.35 | -59.60 |
|                     | 50-100 K | 83.73  | 45.66  | 70.36   | -63.78 | -55.08  | 29.37  |
|                     | 30-50 K  | 62.85  | 67.80  | 69.90   | 58.12  | 53.85   | 64.78  |
|                     | 10-30 K  | 67.85  | 54.67  | 54.74   | 186.95 | -14.49  | 84.97  |
|                     | 3-10 K   | 32.81  | 35.09  | 34.38   | 36.76  | 111.97  | 42.04  |
|                     | <3 K     | -16.60 | -18.49 | -13.26  | -17.03 | -9.08   | -15.94 |
|                     | Total    | 7.28   | -2.60  | -1.13   | -0.18  | -3.26   | -1.11  |
| PS<br>oxidation     | >100 K   | 20.88  | -30.88 | -125.34 | -26.93 | -158.68 | -38.61 |
|                     | 50-100 K | -12.98 | -2.37  | 36.17   | -0.87  | -380.53 | -6.76  |
|                     | 30-50 K  | 59.55  | 28.05  | 25.95   | 34.65  | 36.08   | 34.43  |
|                     | 10-30 K  | 50.44  | 52.67  | 84.18   | 79.44  | 62.31   | 63.50  |
|                     | 3-10 K   | -56.18 | 14.03  | -2.45   | 47.04  | 31.99   | 18.89  |
|                     | <3 K     | 30.44  | 36.65  | 41.04   | 33.65  | 46.60   | 37.51  |
|                     | Total    | 25.86  | 26.78  | 32.03   | 32.74  | 36.19   | 29.75  |
| CF -PS<br>oxidation | >100 K   | 57.36  | -6.98  | 70.42   | 27.96  | -51.18  | 10.77  |
|                     | 50-100 K | 13.42  | 23.22  | 40.69   | 48.45  | 25.13   | 30.35  |
|                     | 30-50 K  | 64.83  | 40.50  | 31.92   | 67.19  | 35.17   | 49.17  |
|                     | 10-30 K  | 56.05  | 38.63  | 67.03   | 57.22  | 31.46   | 47.04  |
|                     | 3-10 K   | 64.32  | 70.53  | 91.91   | 70.63  | 78.59   | 72.65  |
|                     | <3 K     | 36.76  | 38.10  | 29.80   | 37.35  | 37.81   | 36.60  |
|                     | Total    | 44.46  | 39.35  | 40.62   | 41.78  | 39.63   | 40.52  |

## References

1. G. D. Fang , J. Gao , D. D. Dionysiou , C. Liu and D. M. Zhou , Activation of persulfate by quinones: free radical reactions and implication for the degradation of PCBs, *Environ. Sci. Technol.*, 2013, **47** , 4605 –4611.
2. W. T. Shang , Z. J. Dong , M. Li , X. L. Song , M. Zhang , C. C. Jiang and F. Y. Sun , 2019. Degradation of diatrizoate in water by Fe(II)-activated persulfate oxidation, *Chem. Eng. J.*, 2019, **361** , 1333 –1344. doi:10.1016/j.cej.2018.12.139.
3. A. Stefansson , 2007. Iron(III) hydrolysis and solubility at 25 °C, *Environ. Sci. Technol.*, 2007, **41** (17), 6117 – 6123. doi:10.1021/es070174h.
4. Y. F. Rao , L. Qu , H. Yang and W. Chu , Degradation of carbamazepine by Fe(II)-activated persulfate process, *J. Hazard Mater.*, 2014, **268** , 23 –32.
5. T. Olmez-Hanci , I. Arslan-Alaton and B. Gene , Bisphenol a treatment by the hot persulfate process: oxidation products and acute toxicity, *J. Hazard Mater.*, 2013, **263** , 283 –290. doi:10.1016/j.jhazmat.2013.01.032.
6. O. S. Furman , A. L. Teel and R. J. Watts , Mechanism of base activation of persulfate, *Environ. Sci. Technol.*, 2010, **44** (16), 6423 –6428.
7. Y. Q. Gao , N. Y. Gao , Y. Deng , Y. Q. Yang and Y. Ma , Ultraviolet (UV) light-activated persulfate oxidation of sulfamethazine in water, *Chem. Eng. J.*, 2012, 195 –196, 248 –253. doi:10.1016/j.cej.2012.04.084.
8. W. Chu , Y. R. Wang and H. F. Leung , Synergy of sulfate and hydroxyl radicals in UV/  $S_2O_8^{2-}/H_2O_2$  oxidation of iodinated X-ray contrast medium iopromide, *Chem. Eng. J.*, 2011, **178** , 154 –160. doi:10.1016/j.cej.2011.10.033.
